# Supplementary material for: Polygenic Scores and Networks of Psychopathology Symptoms
Source: PubMed Central journal article supplement (PMC11170456; doi:10.1001/jamapsychiatry.2024.1403), 2024-06-12
Supplement: jamapsychiatry-e241403-s003.pdf [file jamapsychiatry-e241403-s003.pdf]

## Data Sharing Statement

Piazza. Polygenic Scores and Networks of Psychopathology Symptoms. *JAMA Psychiatry*.  
Published June 12, 2024. doi:10.1001/jamapsychiatry.2024.1403

### Data

**Data available:** No

### Additional Information

**Explanation for why data not available:** The ALSPAC resource is owned and provided by the University of Bristol. Data can be made available and accessed upon request, as detailed at <https://www.bristol.ac.uk/alspac/researchers/access/>. The TEDS resource is held by King's College London. Data can be made available, subject to a data sharing agreement, as detailed at <https://www.teds.ac.uk/researchers/teds-data-access-policy>.
